# Supplementary material
Source: publisher site journal article supplement (https://www.dovepress.com/article/565624)
Supplement: Supplementary file 1 [file 565624%20Supplementary%20Material_1.docx]

# 1 Supplementary Figures

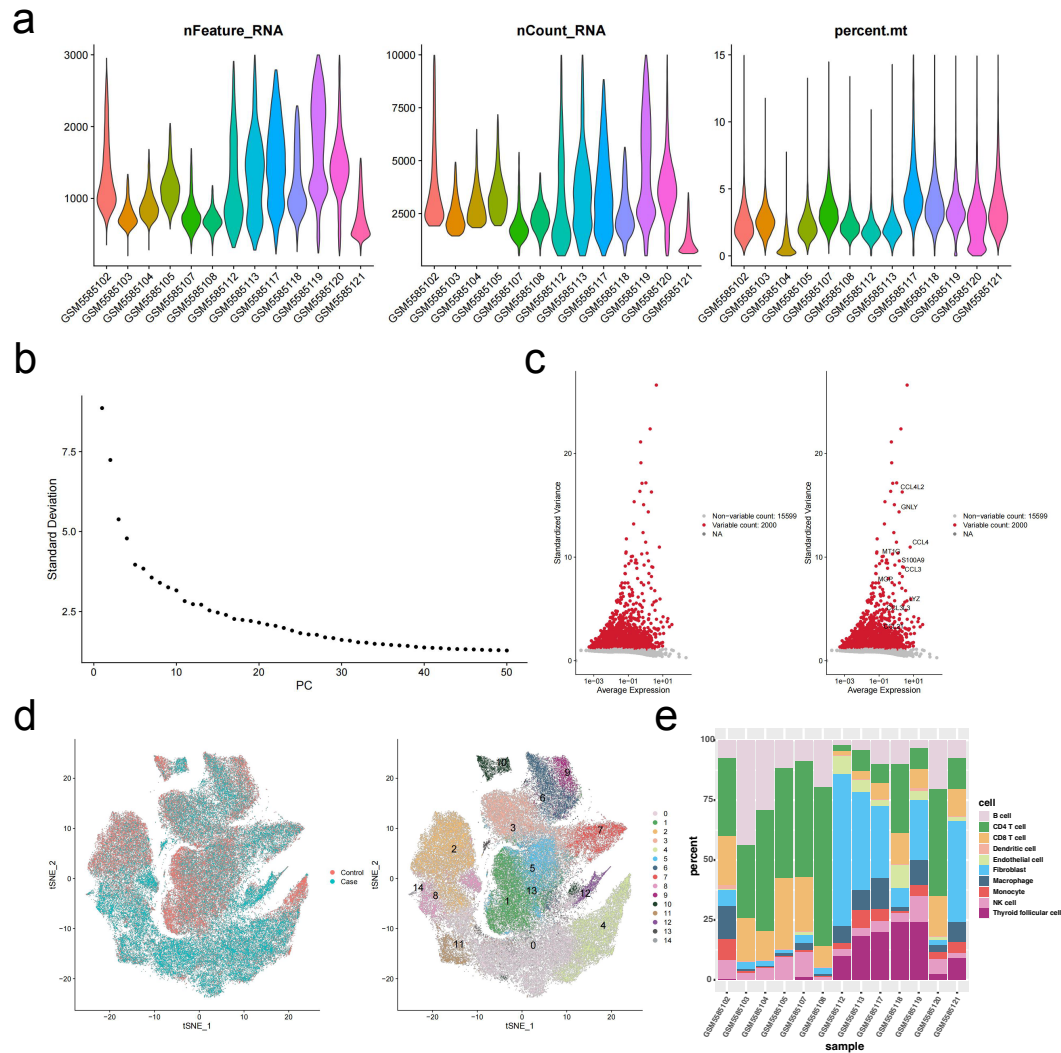

2

## 3 **Figure S1. Quality control and cell proportion analysis of single-cell RNA-seq** 4 **data.**

5 (a–d) Quality control metrics of single-cell data, including filtering thresholds, gene  
6 counts per cell, and mitochondrial gene content. (e) Stacked bar plot showing the  
7 distribution of ten annotated cell types across all samples. The y-axis indicates the  
8 relative proportion of each cell type, and the x-axis represents individual samples.

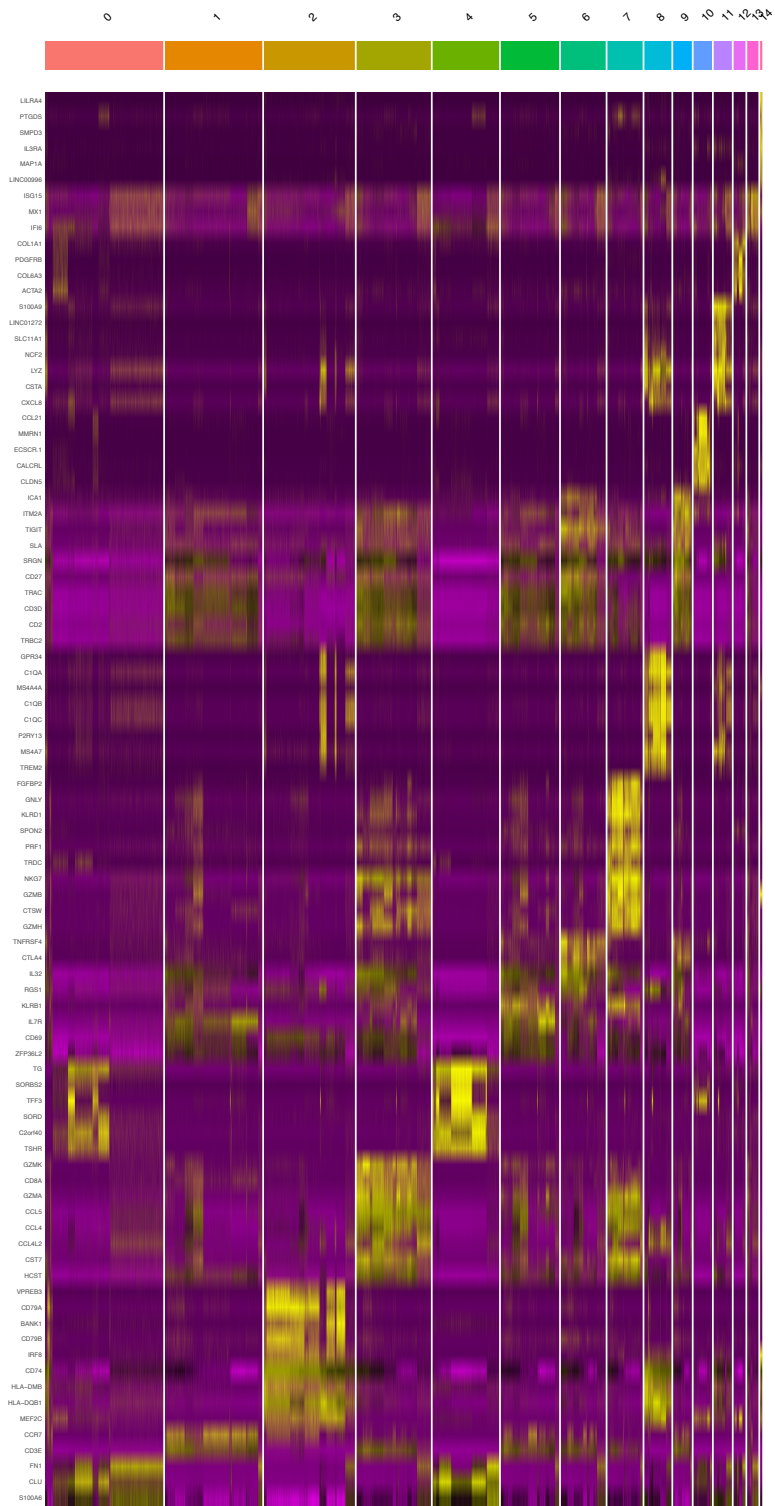

9

10 **Figure S2. Heatmap of top marker genes across identified cell clusters.**

11 Expression heatmap showing representative marker genes used to annotate the ten  
 12 major cell types identified in the single-cell dataset. indicates relative gene expression  
 13 levels.

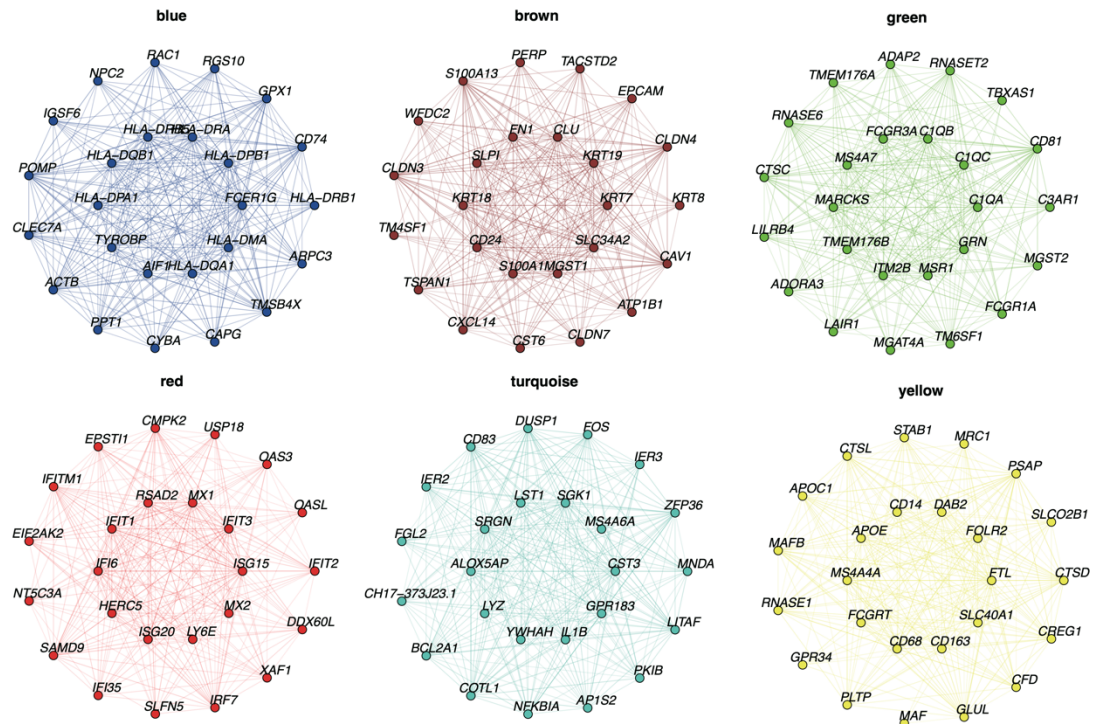

14

15 **Figure S3. Co-expression networks of the six gene modules identified by**  
 16 **hdWGCNA.**

17 Network visualization of the top hub genes in each of the six modules (blue, brown,  
 18 green, red, turquoise, and yellow) constructed via hdWGCNA. Each node represents  
 19 a gene, and each edge represents a significant co-expression relationship. The density  
 20 and connectivity within each module reflect the degree of intra-modular co-regulation.

21

22

23

24

25

26

27

28

29

30

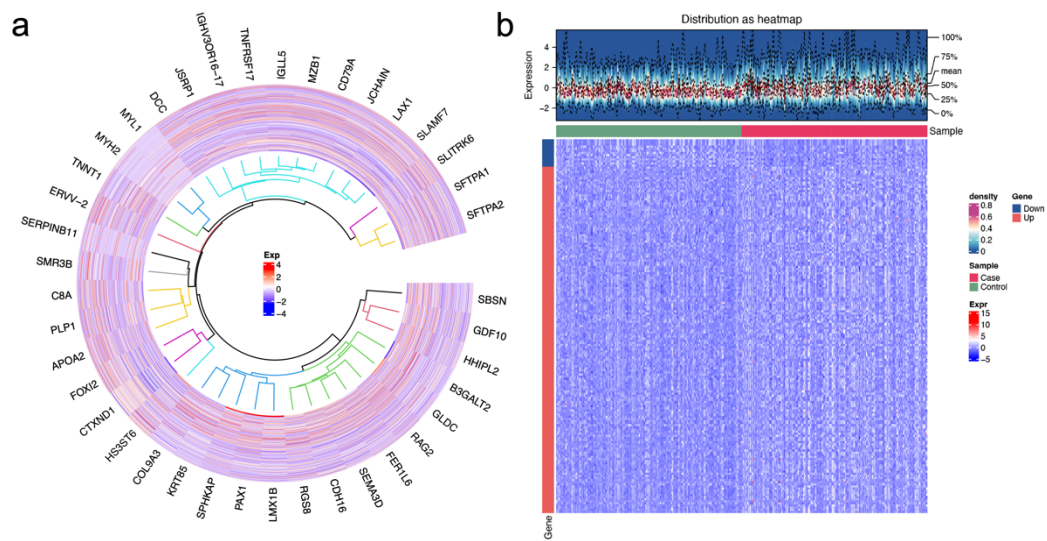

32

33 **Figure S4. Visualization of differentially expressed genes between high- and low-**  
 34 **risk groups.**

35 (a) Circular dendrogram of DEGs based on hierarchical clustering. Colors represent  
 36 gene expression levels, with red indicating upregulation and blue indicating  
 37 downregulation in the high-risk group. (b) Heatmap showing the expression profiles of  
 38 DEGs across samples.

39

40

41

42

43

44

45

46

47

48

49

50

51

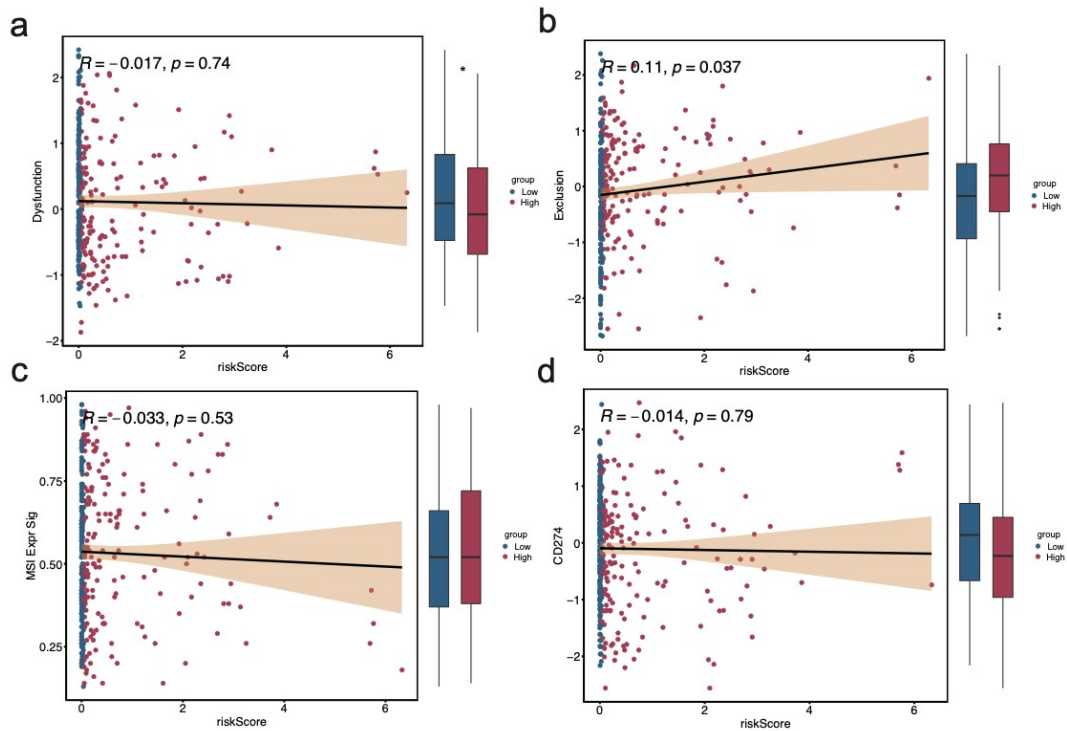

52

53 **Figure S5. Correlation between risk score and immunotherapy response**  
 54 **indicators.**

55 (a) No significant correlation was observed between risk score and T cell dysfunction  
 56 score ( $R = -0.017$ ,  $p = 0.74$ ). (b) A weak but significant positive correlation was found  
 57 between risk score and T cell exclusion score ( $R = 0.11$ ,  $p = 0.037$ ). (c) No significant  
 58 association was detected between risk score and microsatellite instability (MSI)  
 59 expression signature ( $R = -0.033$ ,  $p = 0.53$ ). (d) Risk score was not correlated with  
 60 CD274 (PD-L1) expression ( $R = -0.014$ ,  $p = 0.79$ ).

61

62

63

64

65

66

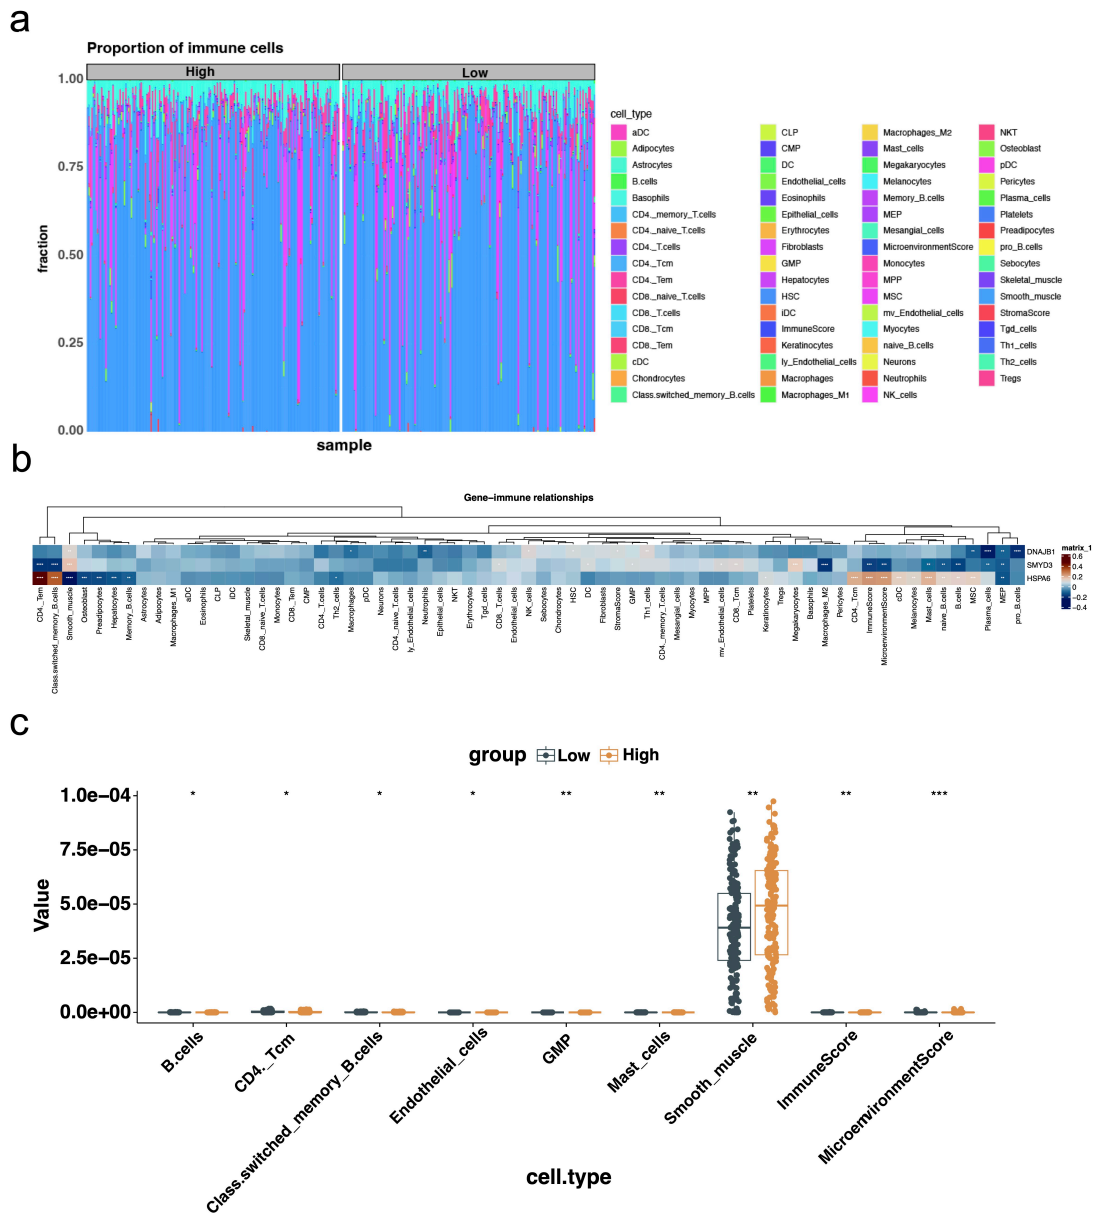

75 high- and low-risk groups. Significant differences were observed in several immune  
76 cell types and microenvironment scores. \* $p < 0.05$ , \*\* $p < 0.01$ , \*\*\* $p < 0.001$ .

77

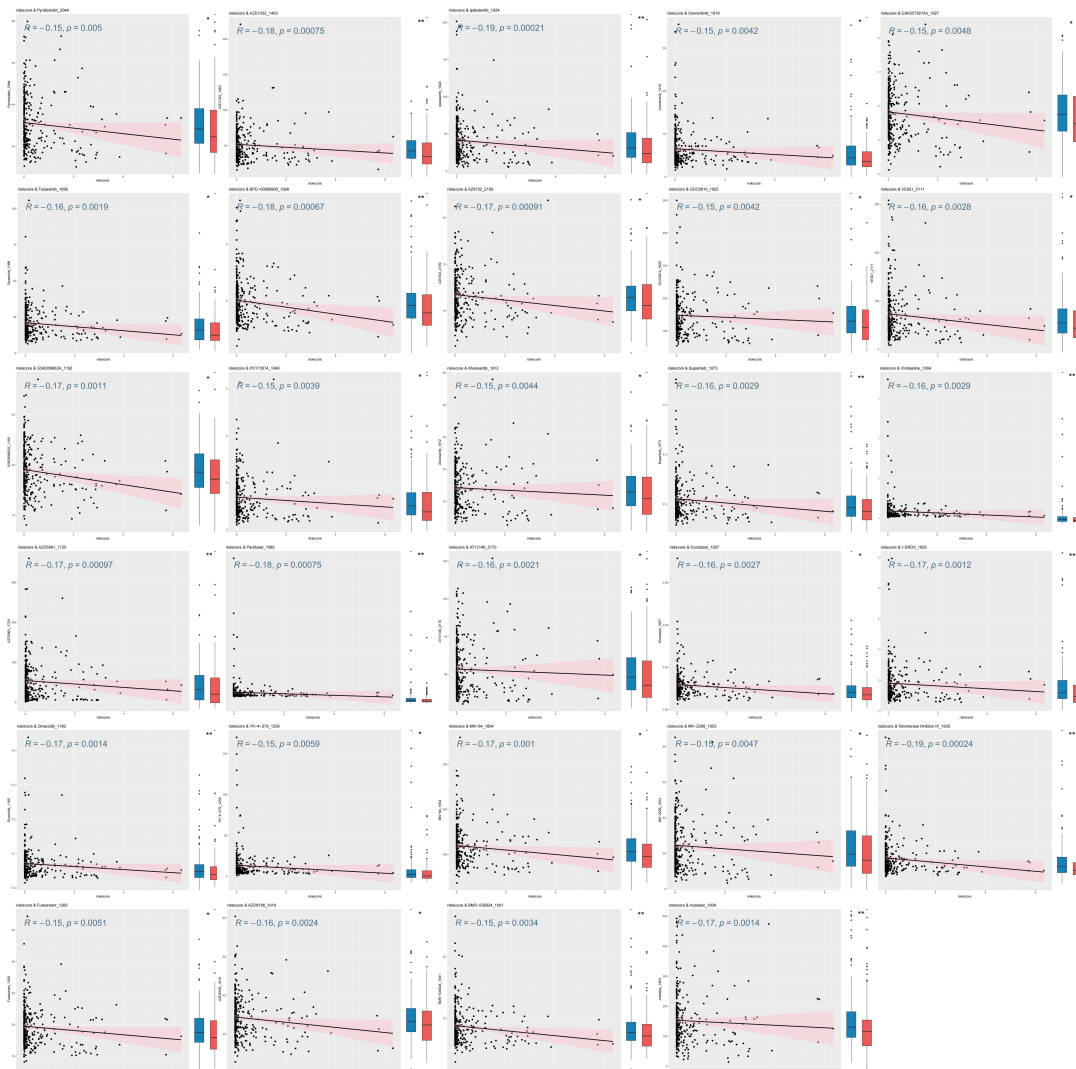

78

79 **Figure S7. Expanded drug sensitivity analysis in high- and low-risk groups.**

80 Scatter plots showing the correlation between risk score and predicted IC50 values for

81 29 candidate compounds based on GDSC2 data.

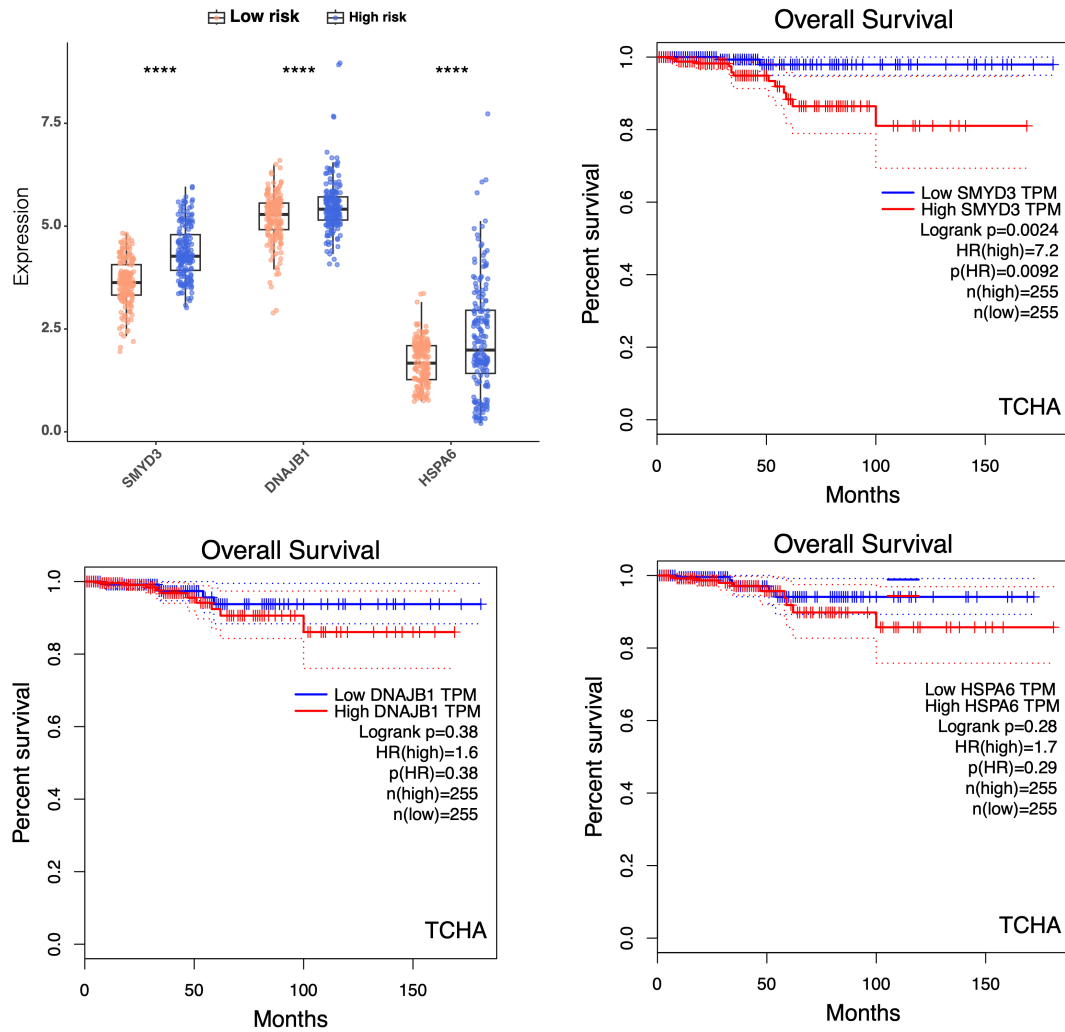

82

83 **Figure S8. Expression patterns and prognostic significance of SMYD3,**  
 84 **DNAJB1, and HSPA6 in thyroid cancer.**

85 (a) Boxplots showing the expression levels of SMYD3, DNAJB1, and HSPA6 between  
 86 low- and high-risk groups. SMYD3 exhibited significantly higher expression in the high-  
 87 risk group compared to the low-risk group. (b–d) Kaplan–Meier survival curves  
 88 stratified by the median expression levels of SMYD3 (b), DNAJB1 (c), and HSPA6 (d)  
 89 in TCGA-THCA patients. High SMYD3 expression was significantly associated with  
 90 poor overall survival (log-rank  $p = 0.0024$ ), while DNAJB1 and HSPA6 showed no  
 91 statistically significant prognostic value.
